# Supplementary material for: Genome-Wide Identification of OSC Gene Family and Potential Function in the Synthesis of Ursane- and Oleanane-Type Triterpene in Momordica charantia
Source: MDPI journal article supplement (doi:10.3390/ijms23010196), 2021-12-24
Supplement: s1 [file s1]

**Genome-wide identification of OSC gene family and potential function in the synthesis of ursane- and oleanane-type triter-pene in *Momordica charantia***

Yutong Han<sup>a,b,c,d,f,l</sup>, Ya Yang<sup>b,c,d,l</sup>, Yan Li<sup>a,b,c,d,f,l</sup>, Xin Yin<sup>b,c,d,f</sup>, Zhiyu Chen<sup>a,b,c,d,f</sup>, Danni Yang<sup>b,c,d,f</sup>, Yongping Yang<sup>b,c,d</sup>, Yunqiang Yang<sup>b,c,d\*</sup>, Xuefei Yang<sup>a,b,e\*</sup>

<sup>a</sup> Key Laboratory of Economic Plants and Biotechnology, Kunming Institute of Botany, Chinese Academy of Sciences, Kunming 650201, China

<sup>b</sup> Key Laboratory for Plant Diversity and Biogeography of East Asia, Kunming Institute of Botany, Chinese Academy of Science, Kunming, 650204, China

<sup>c</sup> Plant Germplasm and Genomics Center, Kunming Institute of Botany, Chinese Academy of Sciences, Kunming 650201, China

<sup>d</sup> Institute of Tibetan Plateau Research at Kunming, Kunming Institute of Botany, Chinese Academy of Sciences, Kunming 650201, China

<sup>e</sup> Southeast Asia Biodiversity Research Institute, Chinese Academy of Sciences, Yezin, NayPyiTaw 05282, Myanmar

<sup>f</sup> University of Chinese Academy of Sciences, Beijing 100049, China

<sup>l</sup> These authors contributed equally to this work.

\* Correspondence: Yunqiang Yang, [yangyunqiang@mail.kib.ac.cn](mailto:yangyunqiang@mail.kib.ac.cn); Tel.: 86-871-65230873. Xuefei Yang, [xuefei@mail.kib.ac.cn](mailto:xuefei@mail.kib.ac.cn); Tel.: 86-871-65223398

**a**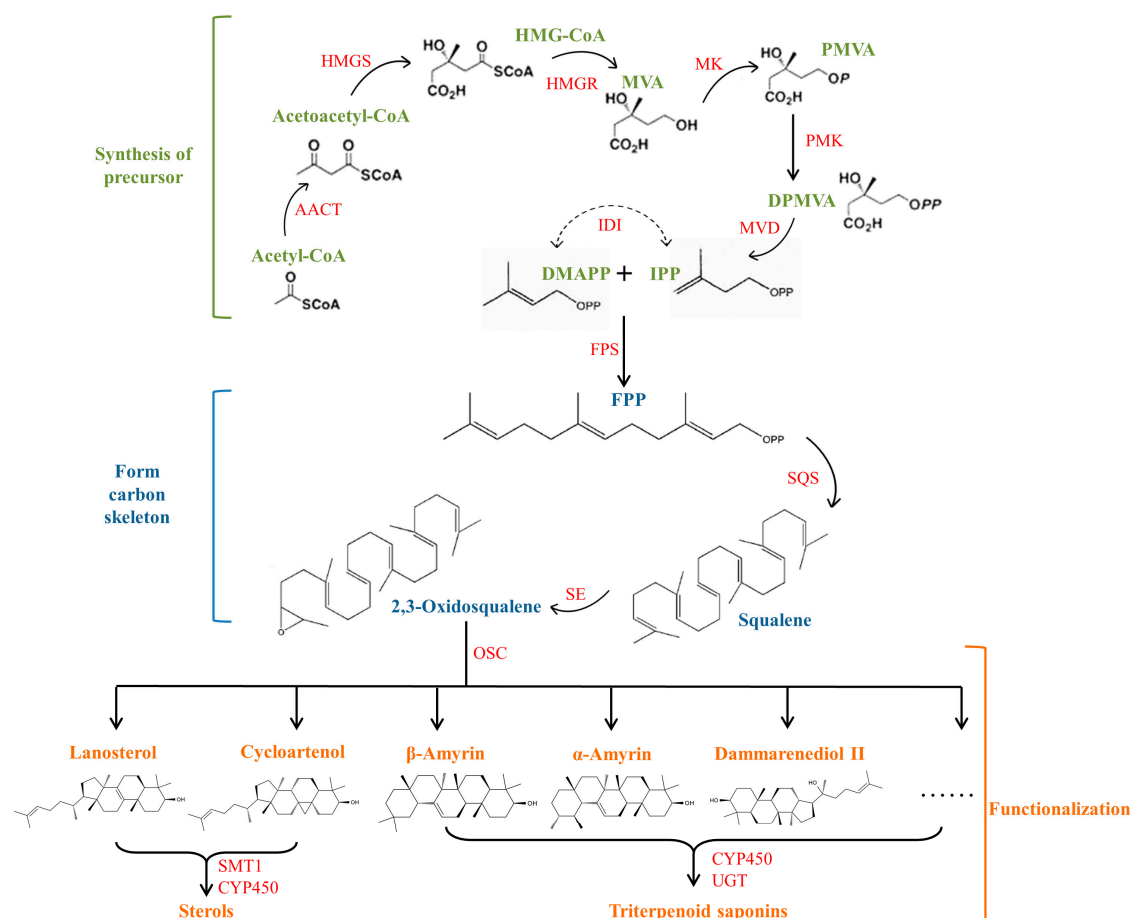**b**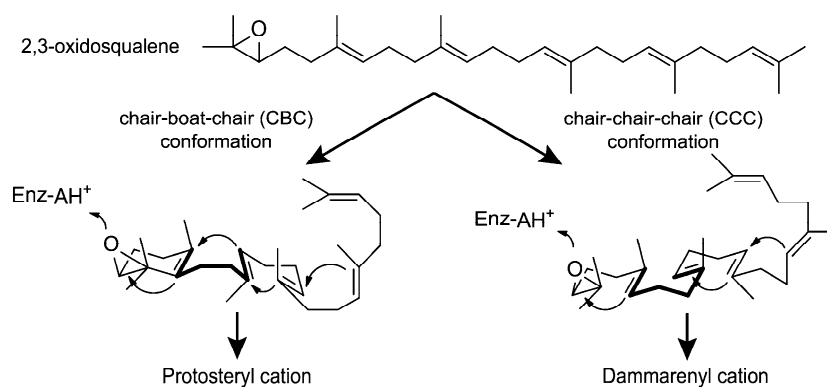

**Figure S1** Synthesis pathway of triterpenoids. **(a)** Triterpenoids are synthesized by the isoprenoid pathway, which can be generally divided into three stages: precursor synthesis, carbon ring skeleton formation and various complex functional reactions; **(b)** Conformational arrangement of 2,3-oxidosqualene [1].

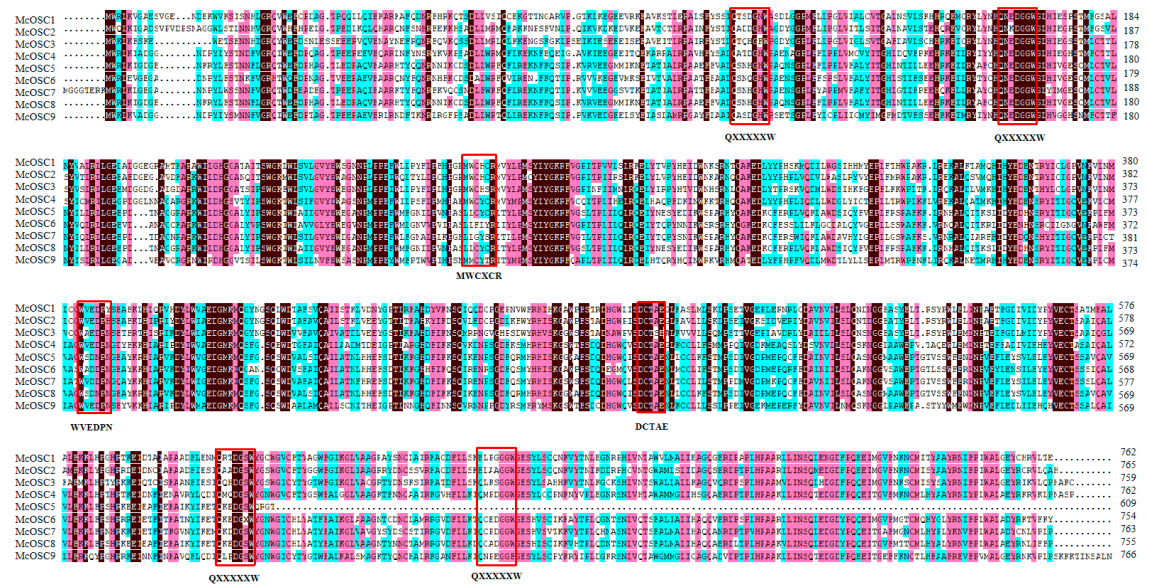

**Figure S2** Conserved domain identification of nine McOSC genes. The red boxes in the figure are the conserved sequences of the OSCs gene family DCTAE, QXXXXXXW, WVDPN and MWCYCR.

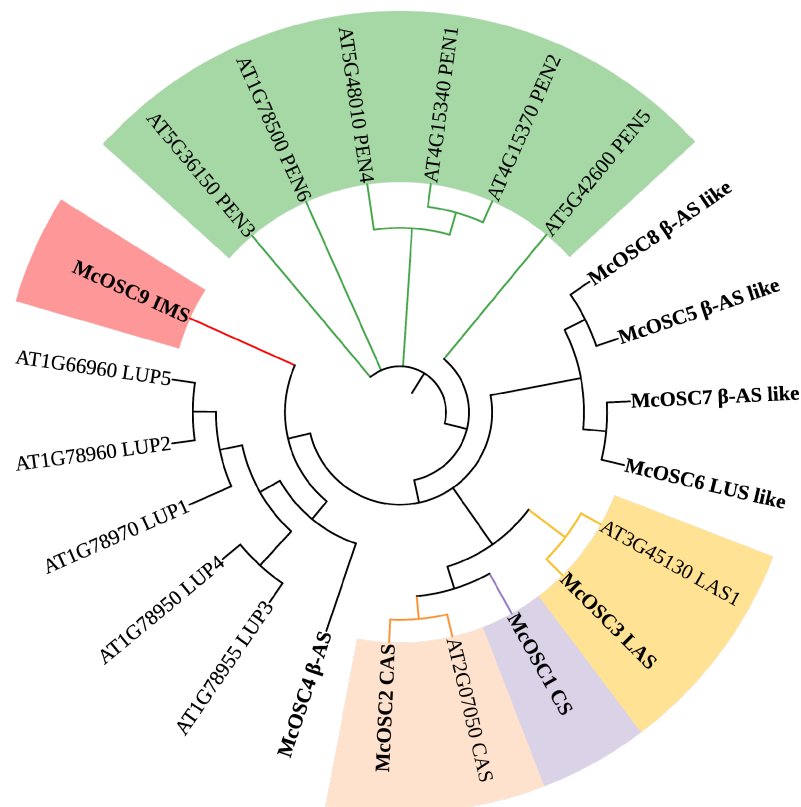

**Figure S3** Phylogenetic analysis of nine McOSC genes with AtOSC genes from *Arabidopsis thaliana*. Genes in bold is OSCs from bitter melon.  $\beta$ -AS:  $\beta$ -Amyrin synthase; LUP: Lupeol

synthase; CAS: Cycloartenol synthase; CS: Cucurbitadienol synthase; IMS: isomultiflorenol synthase; PEN: pentacyclic triterpene synthase.

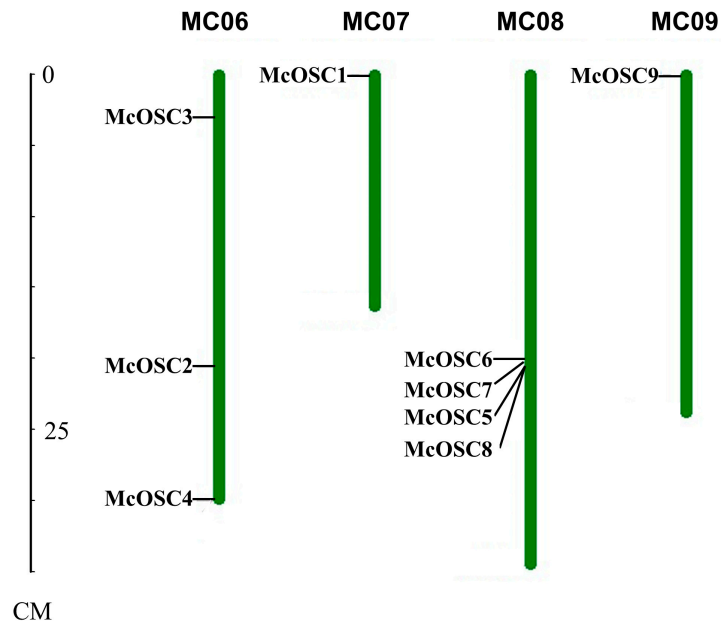

**Figure S4** Chromosome location analysis of nine McOSC genes in bitter melon. The chromosome is shown in green, and the McOSC genes are marked on a line at the approximate position.

**a**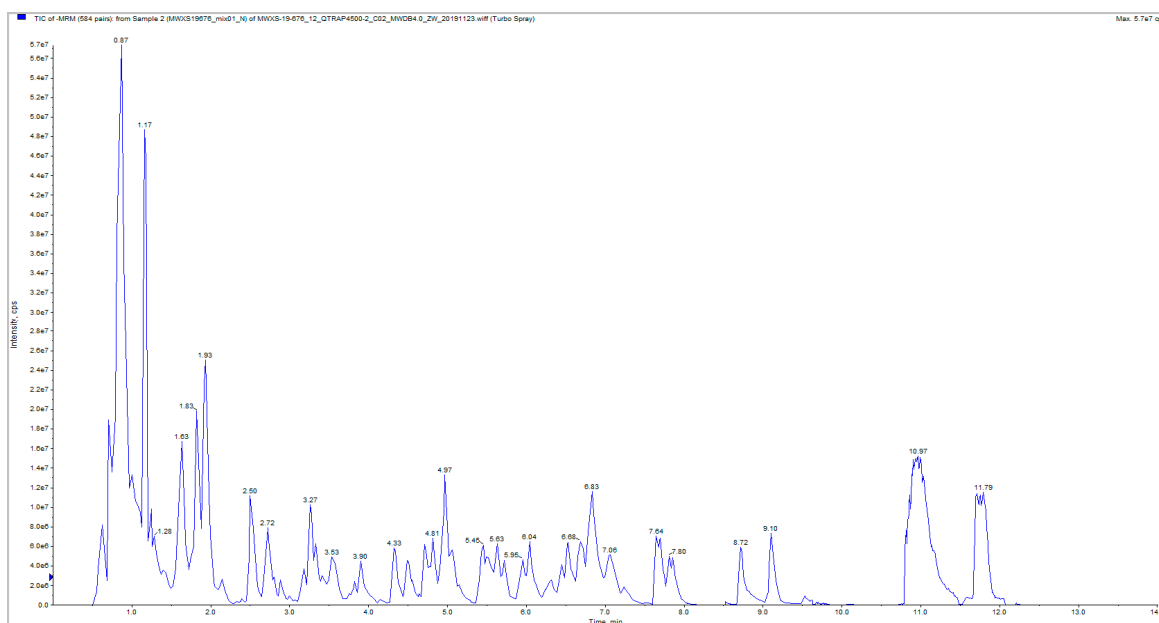**b**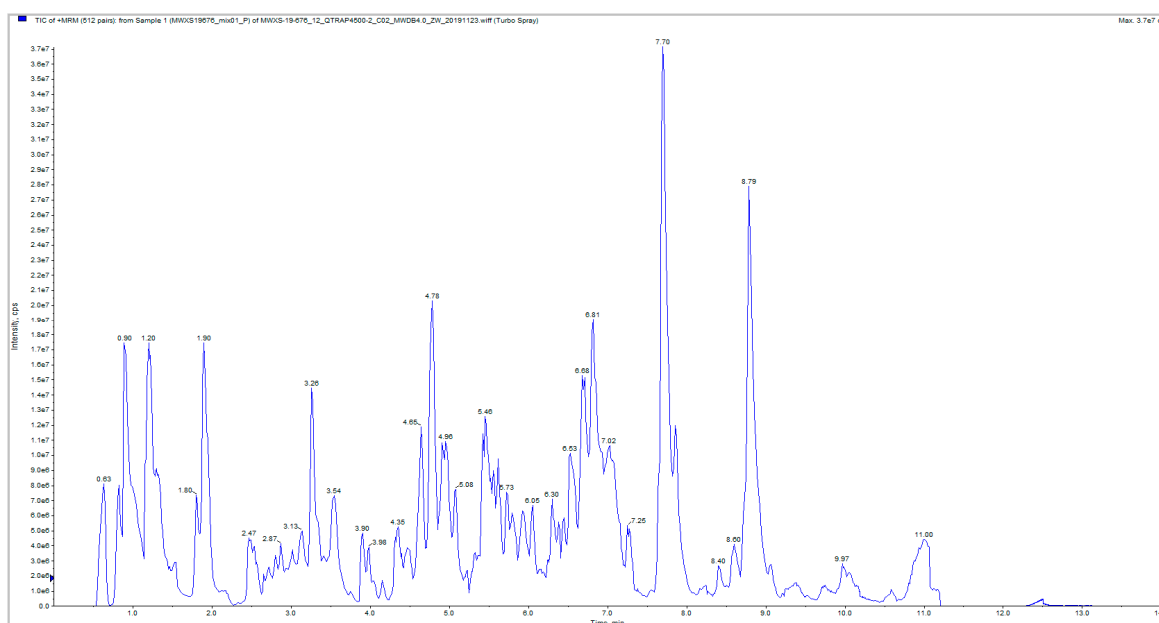

**Figure S5** Total ion flow diagram by mixed phase mass spectrometry (**a**: positive ion mode, **b**: negative ion mode). The abscissa is the Retention time (Rt) of metabolite detection, and the ordinate is the ion flow intensity of ion detection (intensity unit: CPS, count per second).

**a**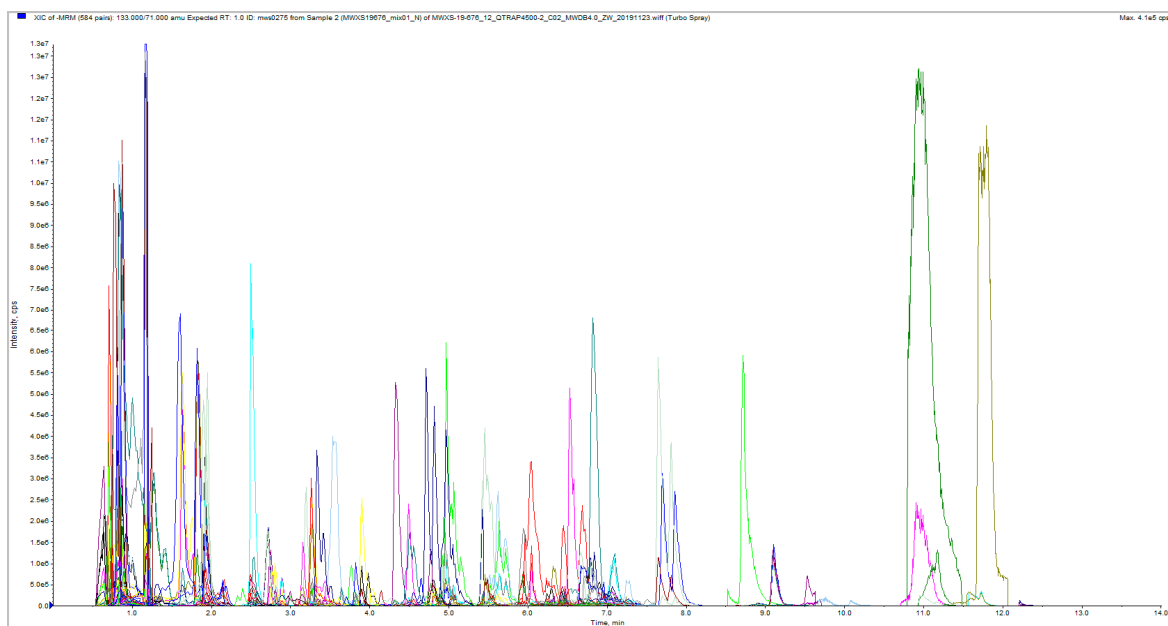**b**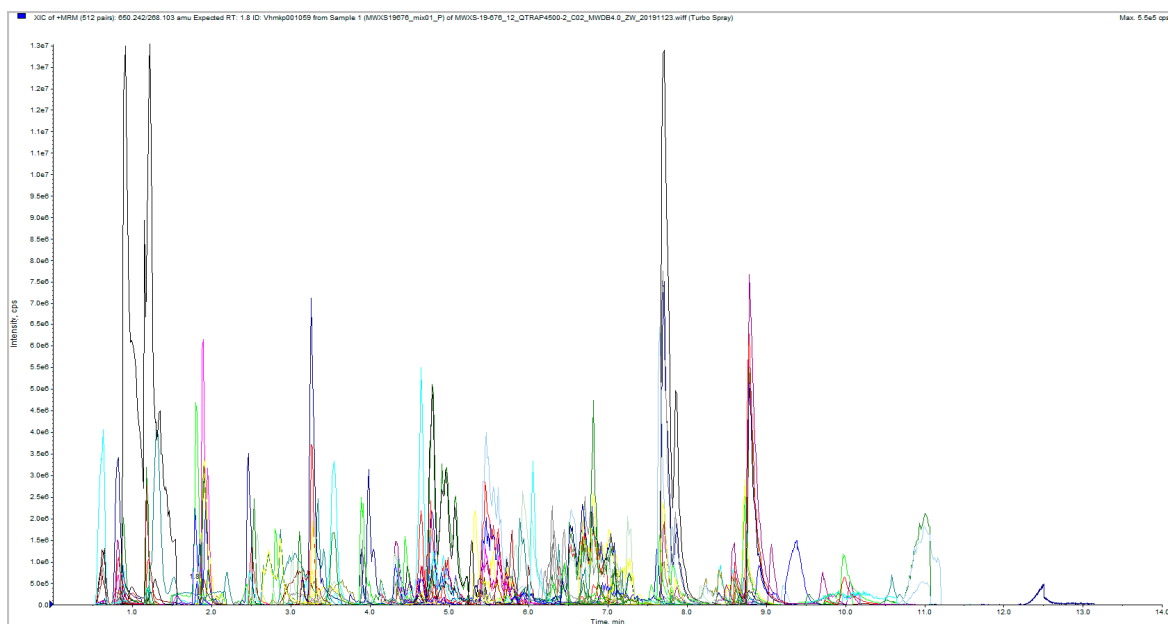

**Figure S6** Multi-peak map of MRM metabolite detection (**a**: positive ion mode, **b**: negative ion mode). The abscissa is the Retention time (Rt) of metabolite detection, and the ordinate is the ion flow intensity of ion detection (intensity unit: CPS, count per second).

**Table S1. Primers used for qPCR analysis**

| Abbreviation  | Primer sequence (5'-3') | Description                                          |
|---------------|-------------------------|------------------------------------------------------|
| <i>McOSC1</i> | AACTGGGCTTCGGATCTTGG    | <i>M. charantia</i> <i>McOSC1</i> primer, forward    |
| <i>McOSC1</i> | CAAACATGGTGCTTGGGCTC    | <i>M. charantia</i> <i>McOSC1</i> primer, reverse    |
| <i>McOSC2</i> | TGCTGTTCAAGCCATCCTGT    | <i>M. charantia</i> <i>McOSC2</i> primer, forward    |
| <i>McOSC2</i> | ATGGGCCATCCATGATCTGC    | <i>M. charantia</i> <i>McOSC2</i> primer, reverse    |
| <i>McOSC3</i> | TGCATCCAGGAAGAATGTGGT   | <i>M. charantia</i> <i>McOSC3</i> primer, forward    |
| <i>McOSC3</i> | GGAACGTGGGGTGTACAAGT    | <i>M. charantia</i> <i>McOSC3</i> primer, reverse    |
| <i>McOSC4</i> | TATGATTGGGCCGGAAGCAA    | <i>M. charantia</i> <i>McOSC4</i> primer, forward    |
| <i>McOSC4</i> | GGCGTGAAGTTCCTGTCTCA    | <i>M. charantia</i> <i>McOSC4</i> primer, reverse    |
| <i>McOSC5</i> | GGCGTCAAATGGTGAATGG     | <i>M. charantia</i> <i>McOSC5</i> primer, forward    |
| <i>McOSC5</i> | TCTTCCTTCCTGTGGCTTGG    | <i>M. charantia</i> <i>McOSC5</i> primer, reverse    |
| <i>McOSC6</i> | CGATTGTGGGGCCAATCAC     | <i>M. charantia</i> <i>McOSC6</i> primer, forward    |
| <i>McOSC6</i> | AAGAGGGGTTCTCCACGTA     | <i>M. charantia</i> <i>McOSC6</i> primer, reverse    |
| <i>McOSC7</i> | ACATTACAGGACATCTTGCACT  | <i>M. charantia</i> <i>McOSC7</i> primer, forward    |
| <i>McOSC7</i> | ACAAGCATCGGTATCGGGTT    | <i>M. charantia</i> <i>McOSC7</i> primer, reverse    |
| <i>McOSC8</i> | CTCAACAGGCAGAGAGGGAC    | <i>M. charantia</i> <i>McOSC8</i> primer, forward    |
| <i>McOSC8</i> | CGATACTCTGCAAGTGCCCA    | <i>M. charantia</i> <i>McOSC8</i> primer, reverse    |
| <i>McOSC9</i> | CTCTCGCCATGCAAGCTCTA    | <i>M. charantia</i> <i>McOSC9</i> primer, forward    |
| <i>McOSC9</i> | TGCCATCCATGGTCACAGTC    | <i>M. charantia</i> <i>McOSC9</i> primer, reverse    |
| <i>β-Tub</i>  | CATCTTCCACCTTTACACCCTG  | <i>M. charantia</i> <i>β-Tubulin</i> primer, forward |
| <i>β-Tub</i>  | CCATGTATCAATCAAACACTCC  | <i>M. charantia</i> <i>β-Tubulin</i> primer, reverse |

**Table S2. Summary information of 9 OSC genes in bitter gourd.**

| Gene name     | Accession      | Types of<br>OSCs | Protein ID     | Gene ID      | MW(Da)    | PI   | GRAVY | NO. of amino<br>acids |
|---------------|----------------|------------------|----------------|--------------|-----------|------|-------|-----------------------|
| <i>McOSC1</i> | XM_022293250.1 | CS               | XP_022148942.1 | LOC111017486 | 187766.25 | 4.91 | 0.739 | 2289                  |
| <i>McOSC2</i> | XM_022282110.1 | CAS              | XP_022137802.1 | LOC111009148 | 188994.65 | 4.94 | 0.657 | 2298                  |
| <i>McOSC3</i> | XM_022279428.1 | LAS              | XP_022135120.1 | LOC111007175 | 186811.53 | 4.93 | 0.749 | 2280                  |
| <i>McOSC4</i> | XM_022299947.1 | $\beta$ -AS      | XP_022155639.1 | LOC111022720 | 187912.45 | 4.91 | 0.753 | 2289                  |
| <i>McOSC5</i> | XM_022294609.1 | $\beta$ -AS-like | XP_022150301.1 | LOC111018501 | 150619.18 | 4.98 | 0.747 | 1830                  |
| <i>McOSC6</i> | XM_022303149.1 | LUP-like         | XP_022158841.1 | LOC111025305 | 186001.19 | 4.94 | 0.736 | 2265                  |
| <i>McOSC7</i> | XM_022303150.1 | $\beta$ -AS-like | XP_022158842.1 | LOC111025306 | 189132.05 | 4.93 | 0.743 | 2292                  |
| <i>McOSC8</i> | XM_022294610.1 | $\beta$ -AS-like | XP_022150302.1 | LOC111018501 | 187365.93 | 4.94 | 0.734 | 2268                  |
| <i>McOSC9</i> | XM_022301789.1 | IMS              | XP_022157481.1 | LOC111024177 | 190518.75 | 4.90 | 0.803 | 2301                  |

Notes: MW means relative molecular mass; PI means theoretical isoelectric point; GRAVY means grand average of hydropathicity. The types of OSCs in the table are:  $\beta$ -AS:  $\beta$ -Amyrin synthase; LUP: Lupeol synthase; CAS: Cycloartenol synthase; LAS, lanosterol synthase; CS: Cucurbitadienol synthase; IMS: isomultiflorenol synthase.



**Table S3. Ten terpene metabolites detected in transgenic hairy roots**

| Compounds                                              | Formula   | Class              | CAS        | Fold Change ( <i>GFP</i> vs. <i>McOSC7-OE</i> ) |
|--------------------------------------------------------|-----------|--------------------|------------|-------------------------------------------------|
| Cucurbitacin D                                         | C30H44O7  | Triterpene         | 3877-86-9  | 1.43053                                         |
| Camaldulenic acid                                      | C30H46O4  | Triterpene         | 71850-15-2 | 2.89626                                         |
| Enoxolone                                              | C30H46O4  | Triterpene         | 471-53-4   | 1.82195                                         |
| Quinovic acid                                          | C30H46O5  | Triterpene         | 465-74-7   | 4.30638                                         |
| 11-Carbonyl-20 $\beta$ -hydroxycucurbitadienol         | C30H48O3  | Triterpene         | -          | 0.78697                                         |
| 24,30-Dihydroxy-12(13)-enolupinol                      | C30H48O3  | Triterpene         | -          | 1.16759                                         |
| 2-Hydroxyoleanolic acid                                | C30H48O4  | Triterpene         | 26707-60-8 | 1.47516                                         |
| 3,24-Dihydroxy-17,21-semiacetal-12(13) oleanolic fruit | C30H48O4  | Triterpene         | -          | 1.47508                                         |
| Maslinic acid                                          | C30H48O4  | Triterpene         | 4373-41-5  | 1.45899                                         |
| Deacetoxycucurbitacin B 3-O-glucoside                  | C36H54O11 | Triterpene Saponin | -          | 1.15847                                         |

Notes: Fold Change represents the fold change of the metabolites of transgenic hairy roots compared with the control.
